# Supplementary material for: An Image-Based Algorithm for Precise and Accurate High Throughput Assessment of Drug Activity against the Human Parasite Trypanosoma cruzi
Source: PubMed Central journal article supplement (PMC3913590; doi:10.1371/journal.pone.0087188), 2014-02-04
Supplement: pone.0087188.s007.pdf [file pone.0087188.s007.pdf]

**Table S1. Comparison of manual and algorithm host cell nuclei detection for Benznidazole DRC plates.**

|                     |         | Manual             | Algorithm          | O.Seg* (%)          | U.Seg* (%)          | Difference (%)      |
|---------------------|---------|--------------------|--------------------|---------------------|---------------------|---------------------|
| 0.78 $\mu$ M        | Image 1 | 243                | 245                | 5 (2.06 %)          | 3 (1.23 %)          | 8 (3.29 %)          |
|                     | Image 2 | 262                | 265                | 7 (2.67 %)          | 4 (1.53 %)          | 11 (4.20 %)         |
|                     | Image 3 | 251                | 249                | 4 (1.59 %)          | 6 (2.39 %)          | 10 (3.98 %)         |
|                     | Image 4 | 235                | 238                | 6 (2.55 %)          | 3 (1.28 %)          | 9 (3.83 %)          |
| 1.56 $\mu$ M        | Image 1 | 258                | 252                | 1 (0.39 %)          | 7 (2.71 %)          | 8 (3.10 %)          |
|                     | Image 2 | 255                | 250                | 2 (0.78 %)          | 7 (2.75 %)          | 9 (3.53 %)          |
|                     | Image 3 | 263                | 261                | 5 (1.90 %)          | 7 (2.66 %)          | 12 (4.56 %)         |
|                     | Image 4 | 279                | 286                | 8 (2.87 %)          | 1 (0.36 %)          | 9 (3.23 %)          |
| 3.13 $\mu$ M        | Image 1 | 280                | 281                | 7 (2.50 %)          | 6 (2.14 %)          | 13 (4.64 %)         |
|                     | Image 2 | 260                | 266                | 9 (3.46 %)          | 3 (1.15 %)          | 12 (4.62 %)         |
|                     | Image 3 | 252                | 251                | 2 (0.79 %)          | 3 (1.19 %)          | 5 (1.98 %)          |
|                     | Image 4 | 273                | 270                | 3 (1.10 %)          | 6 (2.20 %)          | 9 (3.30 %)          |
| 6.25 $\mu$ M        | Image 1 | 272                | 275                | 6 (2.21 %)          | 3 (1.10 %)          | 9 (3.31 %)          |
|                     | Image 2 | 289                | 288                | 5 (1.73 %)          | 6 (2.08 %)          | 11 (3.81 %)         |
|                     | Image 3 | 263                | 262                | 4 (1.52 %)          | 5 (1.90 %)          | 9 (3.42 %)          |
|                     | Image 4 | 274                | 273                | 3 (1.09 %)          | 4 (1.46 %)          | 7 (2.55 %)          |
| 12.5 $\mu$ M        | Image 1 | 281                | 286                | 9 (3.20 %)          | 4 (1.42 %)          | 13 (4.63 %)         |
|                     | Image 2 | 278                | 279                | 4 (1.44 %)          | 3 (1.08 %)          | 7 (2.52 %)          |
|                     | Image 3 | 281                | 280                | 4 (1.42 %)          | 5 (1.78 %)          | 9 (3.20 %)          |
|                     | Image 4 | 259                | 255                | 3 (1.16 %)          | 7 (2.70 %)          | 10 (3.86 %)         |
| 25.0 $\mu$ M        | Image 1 | 281                | 277                | 4 (1.42 %)          | 8 (2.85 %)          | 12 (4.27 %)         |
|                     | Image 2 | 275                | 271                | 3 (1.09 %)          | 7 (2.55 %)          | 10 (3.64 %)         |
|                     | Image 3 | 264                | 269                | 7 (2.65 %)          | 2 (0.76 %)          | 9 (3.41 %)          |
|                     | Image 4 | 296                | 301                | 8 (2.70 %)          | 3 (1.01 %)          | 11 (3.72 %)         |
| 50.0 $\mu$ M        | Image 1 | 289                | 295                | 8 (2.77 %)          | 2 (0.69 %)          | 10 (3.46 %)         |
|                     | Image 2 | 277                | 281                | 7 (2.53 %)          | 3 (1.08 %)          | 10 (3.61 %)         |
|                     | Image 3 | 274                | 279                | 7 (2.55 %)          | 2 (0.73 %)          | 9 (3.28 %)          |
|                     | Image 4 | 301                | 304                | 7 (2.33 %)          | 4 (1.33 %)          | 11 (3.65 %)         |
| 100 $\mu$ M         | Image 1 | 285                | 292                | 8 (2.81 %)          | 1 (0.35 %)          | 9 (3.16 %)          |
|                     | Image 2 | 298                | 302                | 7 (2.35 %)          | 3 (1.01 %)          | 10 (3.36 %)         |
|                     | Image 3 | 287                | 294                | 9 (3.14 %)          | 2 (0.70 %)          | 11 (3.83 %)         |
|                     | Image 4 | 314                | 322                | 9 (2.87 %)          | 1 (0.32 %)          | 10 (3.18 %)         |
| 200 $\mu$ M         | Image 1 | 300                | 308                | 10 (3.33 %)         | 2 (0.67 %)          | 12 (4.00 %)         |
|                     | Image 2 | 302                | 305                | 6 (1.99 %)          | 3 (0.99 %)          | 9 (2.98 %)          |
|                     | Image 3 | 326                | 332                | 7 (2.15 %)          | 1 (0.31 %)          | 8 (2.45 %)          |
|                     | Image 4 | 304                | 311                | 8 (2.63 %)          | 1 (0.33 %)          | 9 (2.96 %)          |
| 400 $\mu$ M         | Image 1 | 306                | 316                | 10 (3.27 %)         | 0 (0.00 %)          | 10 (3.27 %)         |
|                     | Image 2 | 335                | 339                | 9 (2.69 %)          | 5 (1.49 %)          | 14 (4.18 %)         |
|                     | Image 3 | 310                | 314                | 5 (1.61 %)          | 1 (0.32 %)          | 6 (1.94 %)          |
|                     | Image 4 | 317                | 318                | 5 (1.58 %)          | 4 (1.26 %)          | 9 (2.84 %)          |
| Average $\pm$ Stdev |         | 281.23 $\pm$ 22.50 | 283.55 $\pm$ 24.75 | 6.03 $\pm$ 2.36     | 3.70 $\pm$ 2.10     | 9.73 $\pm$ 1.84     |
|                     |         | -                  | -                  | (2.14 $\pm$ 0.84 %) | (1.32 $\pm$ 0.75 %) | (3.46 $\pm$ 0.66 %) |

\* O.Seg and U.Seg mean over-segmented nuclei and under-segmented nuclei respectively.
