# Supplementary material for: An Image-Based Algorithm for Precise and Accurate High Throughput Assessment of Drug Activity against the Human Parasite Trypanosoma cruzi
Source: PubMed Central journal article supplement (PMC3913590; doi:10.1371/journal.pone.0087188), 2014-02-04
Supplement: pone.0087188.s008.pdf [file pone.0087188.s008.pdf]

**Table S2. Comparison of manual and algorithm host cell nuclei detection for Nifurtimox DRC plates.**

|                     |         | Manual             | Algorithm          | O.Seg* (%)          | U.Seg* (%)          | Difference (%)      |
|---------------------|---------|--------------------|--------------------|---------------------|---------------------|---------------------|
| 0.20 $\mu$ M        | Image 1 | 253                | 251                | 4 (1.58 %)          | 6 (2.37 %)          | 10 (3.95 %)         |
|                     | Image 2 | 264                | 264                | 4 (1.52 %)          | 4 (1.52 %)          | 8 (3.03 %)          |
|                     | Image 3 | 247                | 246                | 4 (1.62 %)          | 5 (2.02 %)          | 9 (3.64 %)          |
|                     | Image 4 | 262                | 264                | 7 (2.67 %)          | 5 (1.91 %)          | 12 (4.58 %)         |
| 0.39 $\mu$ M        | Image 1 | 257                | 254                | 4 (1.56 %)          | 7 (2.72 %)          | 11 (4.28 %)         |
|                     | Image 2 | 259                | 261                | 5 (1.93 %)          | 3 (1.16 %)          | 8 (3.09 %)          |
|                     | Image 3 | 278                | 275                | 2 (0.72 %)          | 5 (1.80 %)          | 7 (2.52 %)          |
|                     | Image 4 | 266                | 269                | 6 (2.26 %)          | 3 (1.13 %)          | 9 (3.38 %)          |
| 0.78 $\mu$ M        | Image 1 | 268                | 269                | 4 (1.49 %)          | 3 (1.12 %)          | 7 (2.61 %)          |
|                     | Image 2 | 280                | 281                | 6 (2.14 %)          | 5 (1.79 %)          | 11 (3.93 %)         |
|                     | Image 3 | 256                | 259                | 4 (1.56 %)          | 1 (0.39 %)          | 5 (1.95 %)          |
|                     | Image 4 | 271                | 274                | 5 (1.85 %)          | 2 (0.74 %)          | 7 (2.58 %)          |
| 1.56 $\mu$ M        | Image 1 | 265                | 263                | 3 (1.13 %)          | 5 (1.89 %)          | 8 (3.02 %)          |
|                     | Image 2 | 262                | 263                | 3 (1.15 %)          | 2 (0.76 %)          | 5 (1.90 %)          |
|                     | Image 3 | 288                | 290                | 7 (2.43 %)          | 5 (1.74 %)          | 12 (4.17 %)         |
|                     | Image 4 | 281                | 280                | 5 (1.78 %)          | 6 (2.14 %)          | 11 (3.91 %)         |
| 3.13 $\mu$ M        | Image 1 | 263                | 268                | 6 (2.28 %)          | 1 (0.38 %)          | 7 (2.66 %)          |
|                     | Image 2 | 290                | 294                | 7 (2.41 %)          | 3 (1.03 %)          | 10 (3.45 %)         |
|                     | Image 3 | 271                | 267                | 4 (1.48 %)          | 8 (2.95 %)          | 12 (4.43 %)         |
|                     | Image 4 | 282                | 286                | 9 (3.19 %)          | 5 (1.77 %)          | 14 (4.96 %)         |
| 6.25 $\mu$ M        | Image 1 | 271                | 277                | 8 (2.95 %)          | 2 (0.74 %)          | 10 (3.69 %)         |
|                     | Image 2 | 292                | 294                | 5 (1.71 %)          | 3 (1.03 %)          | 8 (2.74 %)          |
|                     | Image 3 | 265                | 266                | 6 (2.26 %)          | 5 (1.88 %)          | 11 (4.15 %)         |
|                     | Image 4 | 286                | 289                | 6 (2.10 %)          | 3 (1.05 %)          | 9 (3.15 %)          |
| 12.5 $\mu$ M        | Image 1 | 293                | 298                | 8 (2.73 %)          | 3 (1.02 %)          | 11 (3.75 %)         |
|                     | Image 2 | 275                | 280                | 7 (2.55 %)          | 2 (0.73 %)          | 9 (3.27 %)          |
|                     | Image 3 | 304                | 309                | 7 (2.30 %)          | 2 (0.66 %)          | 9 (2.96 %)          |
|                     | Image 4 | 286                | 283                | 5 (1.75 %)          | 8 (2.80 %)          | 13 (4.55 %)         |
| 25.0 $\mu$ M        | Image 1 | 300                | 304                | 7 (2.33 %)          | 3 (1.00 %)          | 10 (3.33 %)         |
|                     | Image 2 | 295                | 304                | 9 (3.05 %)          | 0 (0.00 %)          | 9 (3.05 %)          |
|                     | Image 3 | 306                | 305                | 4 (1.31 %)          | 5 (1.63 %)          | 9 (2.94 %)          |
|                     | Image 4 | 284                | 284                | 5 (1.76 %)          | 5 (1.76 %)          | 10 (3.52 %)         |
| 50.0 $\mu$ M        | Image 1 | 298                | 298                | 4 (1.34 %)          | 4 (1.34 %)          | 8 (2.68 %)          |
|                     | Image 2 | 314                | 310                | 1 (0.32 %)          | 5 (1.59 %)          | 6 (1.91 %)          |
|                     | Image 3 | 299                | 305                | 8 (2.68 %)          | 2 (0.67 %)          | 10 (3.34 %)         |
|                     | Image 4 | 303                | 305                | 3 (0.99 %)          | 1 (0.33 %)          | 4 (1.32 %)          |
| 100 $\mu$ M         | Image 1 | 301                | 302                | 3 (1.00 %)          | 2 (0.66 %)          | 5 (1.66 %)          |
|                     | Image 2 | 317                | 315                | 5 (1.58 %)          | 7 (2.21 %)          | 12 (3.79 %)         |
|                     | Image 3 | 309                | 317                | 10 (3.24 %)         | 2 (0.65 %)          | 12 (3.88 %)         |
|                     | Image 4 | 305                | 311                | 9 (2.95 %)          | 3 (0.98 %)          | 12 (3.93 %)         |
| Average $\pm$ Stdev |         | 281.65 $\pm$ 18.44 | 283.35 $\pm$ 19.38 | 5.48 $\pm$ 2.06     | 3.78 $\pm$ 1.94     | 9.25 $\pm$ 2.35     |
|                     |         | -                  | -                  | (1.94 $\pm$ 0.73 %) | (1.34 $\pm$ 0.69 %) | (3.28 $\pm$ 0.84 %) |

\* O.Seg and U.Seg mean over-segmented nuclei and under-segmented nuclei respectively.
