# Supplementary material for: An Image-Based Algorithm for Precise and Accurate High Throughput Assessment of Drug Activity against the Human Parasite Trypanosoma cruzi
Source: PubMed Central journal article supplement (PMC3913590; doi:10.1371/journal.pone.0087188), 2014-02-04
Supplement: pone.0087188.s009.pdf [file pone.0087188.s009.pdf]

**Table S3. Number of host cells counted from Benznidazole DRC plates.**

| Dose               | Number of host cells |       |
|--------------------|----------------------|-------|
|                    | Average              | Stdev |
| 0.78 $\mu\text{M}$ | 1012.35              | 39.72 |
| 1.56 $\mu\text{M}$ | 1035.59              | 35.27 |
| 3.13 $\mu\text{M}$ | 1061.03              | 36.66 |
| 6.25 $\mu\text{M}$ | 1095.08              | 40.95 |
| 12.5 $\mu\text{M}$ | 1102.52              | 34.38 |
| 25.0 $\mu\text{M}$ | 1122.57              | 37.55 |
| 50.0 $\mu\text{M}$ | 1144.02              | 36.10 |
| 100 $\mu\text{M}$  | 1181.30              | 35.24 |
| 200 $\mu\text{M}$  | 1233.54              | 45.60 |
| 400 $\mu\text{M}$  | 1268.36              | 42.49 |
