# Supplementary material for: An Image-Based Algorithm for Precise and Accurate High Throughput Assessment of Drug Activity against the Human Parasite Trypanosoma cruzi
Source: PubMed Central journal article supplement (PMC3913590; doi:10.1371/journal.pone.0087188), 2014-02-04
Supplement: pone.0087188.s010.pdf [file pone.0087188.s010.pdf]

**Table S4. Number of host cells counted from Nifurtimox DRC plates.**

| Dose               | Number of host cells |       |
|--------------------|----------------------|-------|
|                    | Average              | Stdev |
| 0.20 $\mu\text{M}$ | 1027.82              | 40.24 |
| 0.39 $\mu\text{M}$ | 1035.70              | 48.91 |
| 0.78 $\mu\text{M}$ | 1071.71              | 39.00 |
| 1.56 $\mu\text{M}$ | 1089.08              | 40.14 |
| 3.13 $\mu\text{M}$ | 1106.22              | 36.73 |
| 6.25 $\mu\text{M}$ | 1122.66              | 46.10 |
| 12.5 $\mu\text{M}$ | 1154.59              | 39.18 |
| 25.0 $\mu\text{M}$ | 1177.26              | 36.84 |
| 50.0 $\mu\text{M}$ | 1207.21              | 40.60 |
| 100 $\mu\text{M}$  | 1222.19              | 38.62 |
